# Supplementary material
Source: PubMed Central journal article supplement (PMC4558242)
Supplement: NIHMS703701-supplement-Supplemental_Material.pdf [file NIHMS703701-supplement-Supplemental_Material.pdf]

## **SUPPLEMENTAL MATERIAL**

McEvoy et al. High-sensitivity Cardiac Troponin T and Risk of Hypertension

**eFigure 1. Flow Chart of exclusion process used to construct the main study sample used to assess the primary outcome of Diagnosed Hypertension, drawn from ARIC subjects free of baseline hypertension or cardiovascular disease**

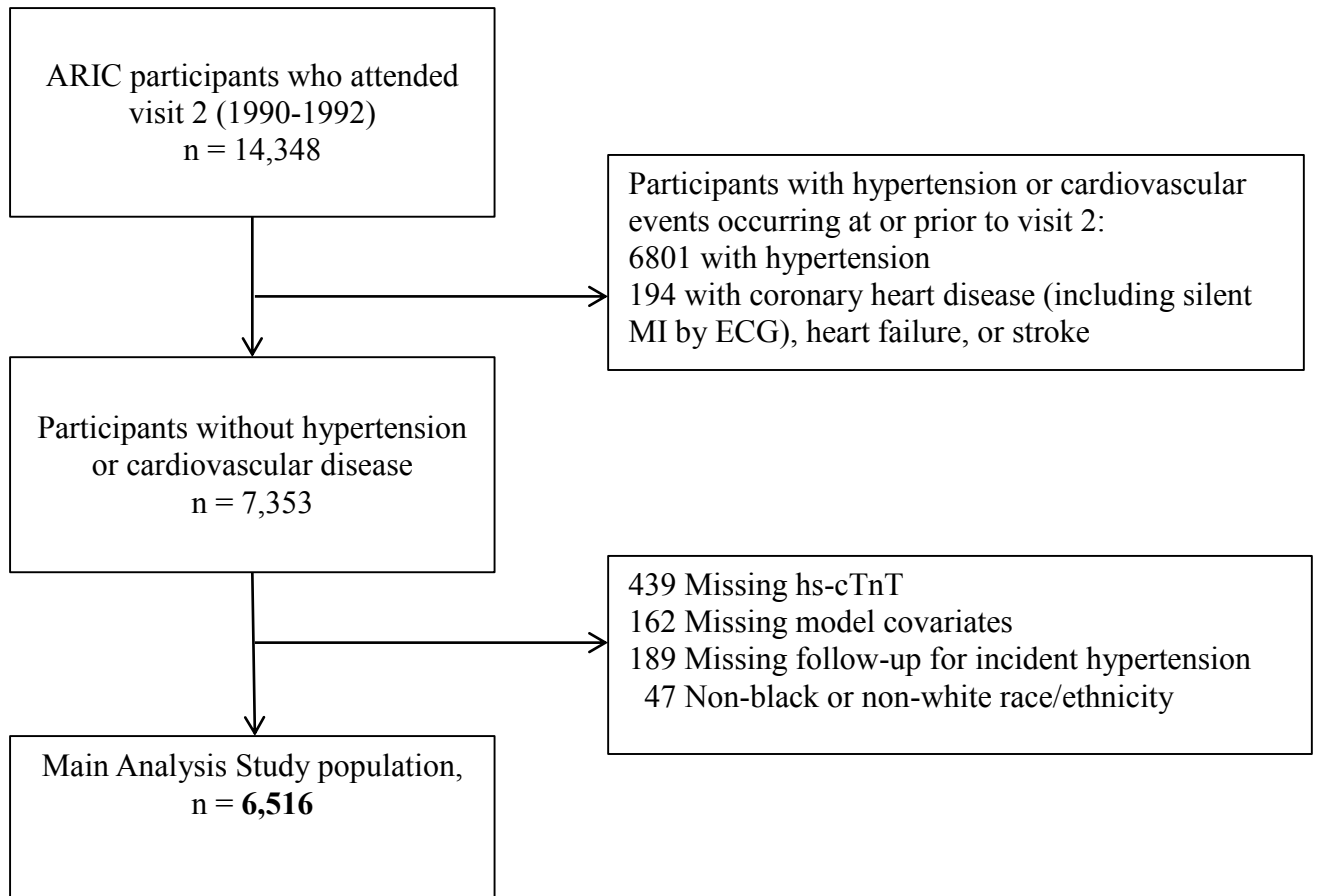

**eTable 1- Study Sample Exclusion Process for Secondary Outcomes of interest**

| <b>Exclusion Process</b>                                 | <b>Exclusion</b> | <b>Population</b> |
|----------------------------------------------------------|------------------|-------------------|
| <b>1- Visit-Based Hypertension</b>                       |                  |                   |
| Attended visit 2                                         |                  | 14348             |
| Missing hs-cTnT data at visit 2                          | 923              | 13426             |
| Prevalent diagnosed hypertension at or before visit 2    | 6334             | 7091              |
| Prevalent elevated blood pressure at or before visit 2   | 599              | 6492              |
| Prevalent CHD, HF, stroke                                | 177              | 6315              |
| Missing follow-up hypertension information after visit 2 | 192              | 6123              |
| Missing follow-up BP information at visits 2 and 4       | 242              | 5881              |
| Missing visit 2 variables of interest                    | 159              | 5722              |
| Non black or white, race-center exclusion                | 47               | <b>5675</b>       |
| <b>2- 6-year risk of incident LVH</b>                    |                  |                   |
| Attended visit 2                                         |                  | 14348             |
| Missing hs-cTnT data at visit 2                          | 923              | 13426             |
| Prevalent diagnosed hypertension at or before visit 2    | 6334             | 7091              |
| Prevalent elevated blood pressure at or before visit 2   | 599              | 6492              |
| Prevalent CHD, HF, stroke                                | 177              | 6315              |
| Missing follow-up hypertension information after visit 2 | 192              | 6123              |
| Missing follow-up BP information at visits 2 and 4       | 242              | 5881              |
| Missing visit 2 variables of interest                    | 159              | 5722              |
| Non black or white, race-center exclusion                | 47               | 5675              |
| Prevalent LVH by EKG (visit 1 or 2)                      | 44               | <b>5631</b>       |

**eTable 2- Characteristics of persons with missing values for high sensitivity cardiac troponin T (ng/L) or for covariates of interest at baseline (1990-1992) compared to persons included in the analysis**

|                                                     | Original Sample | Persons with missing data | p-value |
|-----------------------------------------------------|-----------------|---------------------------|---------|
| <b>Number</b>                                       | 6516            | 785                       |         |
| <b>Age, years</b>                                   | 56.1 (5.6)      | 57.7 (5.7)                | <0.001  |
| <b>Male %</b>                                       | 44.1            | 51.7                      | <0.001  |
| <b>Black %</b>                                      | 17.3            | 15.3                      | 0.161   |
| <b>Current smoker %</b>                             | 22.8            | 29.4                      | <0.001  |
| <b>Systolic blood pressure mmHg</b>                 | 115.2 (15.1)    | 117.1 (16.2)              | <0.001  |
| <b>Diastolic blood pressure mmHg</b>                | 69.7 (9.1)      | 69.5 (9.4)                | 0.317   |
| <b>Hypertension categories (%)</b>                  |                 |                           | 0.002   |
| <b>Normotension (BP &lt;120/80 mmHg)</b>            | 66.3            | 62.4                      |         |
| <b>Prehypertension (BP 120-139/80-89 mmHg)</b>      | 27.4            | 28.2                      |         |
| <b>Elevated Blood Pressure (BP &gt;140/90mmHg)*</b> | 6.3             | 9.4                       |         |
| <b>LVH %</b>                                        | 0.9             | 1.1                       | 0.399   |
| <b>BMI, kg/m2</b>                                   |                 |                           | 0.313   |
| <b>Normal weight % (&lt; 25)</b>                    | 39.0            | 40.6                      |         |
| <b>Overweight % (25 - 30)</b>                       | 41.1            | 37.8                      |         |
| <b>Obese % (&gt; 30)</b>                            | 20.0            | 20.5                      |         |
| <b>Total cholesterol, mg/dL</b>                     | 207.4 (37.6)    | 211.6 (43.0)              | <0.001  |
| <b>LDL-cholesterol, mg/dL</b>                       | 131.8 (35.9)    | 132.8 (35.6)              | 0.361   |
| <b>HDL-cholesterol, mg/dL</b>                       | 51.5 (16.9)     | 46.2 (16.5)               | <0.001  |
| <b>Triglyceride, mg/dL</b>                          | 120.6 (61.0)    | 166.1 (168.5)             | <0.001  |
| <b>Lipid Medicines %</b>                            | 3.3             | 3.9                       | 0.321   |
| <b>Diagnosed diabetes %</b>                         | 4.2             | 6.9                       | <0.001  |
| <b>eGFR &lt;60 mL/min/1.73m2 (%)</b>                | 0.5             | 1.0                       | 0.069   |

**eTable 3- Crude incidence rates and adjusted\* hazard ratios (95% confidence intervals) for incident diagnosed hypertension outcome after excluding persons with baseline elevated blood pressure (n=599), according to baseline high sensitivity cardiac troponin T**

|                                        |      |            |                                                 | Proportional Hazards Regression† | Competing Risks Regression‡ |
|----------------------------------------|------|------------|-------------------------------------------------|----------------------------------|-----------------------------|
| Baseline hs-cTnT                       | N    | Events (n) | Incidence rate, per 1,000 person years (95% CI) | HR (95% CI)                      | HR (95% CI)                 |
| <b>Incident Diagnosed Hypertension</b> |      |            |                                                 |                                  |                             |
| <b>Categories</b>                      |      |            |                                                 |                                  |                             |
| <5 ng/L                                | 4328 | 2787       | 50.8<br>(48.9-52.7)                             | 1<br>(reference)                 | 1<br>(reference)            |
| 5-8 ng/L                               | 1163 | 794        | 58.4<br>(54.5-62.6)                             | 1.14<br>(1.05-1.24)              | 1.14<br>(1.05-1.23)         |
| 9-13 ng/L                              | 321  | 224        | 64.5<br>(56.6-73.6)                             | 1.25<br>(1.08-1.44)              | 1.17<br>(1.00-1.36)         |
| ≥14 ng/L                               | 105  | 70         | 62.3<br>(49.3-78.7)                             | 1.21<br>(0.95-1.53)              | 1.04<br>(0.80-1.34)         |
| <i>p-value for linear trend</i>        |      |            |                                                 | <i>&lt;0.001</i>                 | <i>0.010</i>                |
| <b>Continuous</b>                      |      |            |                                                 |                                  |                             |
| Log(hs-cTnT)                           | 5917 | 3875       | 53.0<br>(51.4-54.7)                             | 1.12<br>(1.07-1.17)              | 1.11<br>(1.06-1.16)         |

\* Adjusted for age (years), race-center (whites-Washington County; whites-Minneapolis; blacks-Jackson; blacks-Forsyth County, whites-Forsyth County), sex (male or female), body mass index (kg/m<sup>2</sup>), smoking (current; former; never), LDL-cholesterol (mg/dL), HDL-cholesterol (mg/dL), triglycerides (mg/dL), estimated glomerular filtration rate (mL/min/1.73m<sup>2</sup>), current lipid-lowering medication use (yes or no), left ventricular hypertrophy (yes or no), diagnosed diabetes (yes or no). Abbreviations as per Table 1.

†Cox regression for diagnosed hypertension outcome, cloglog regression for visit-based hypertension

‡Fine-Gray regression model. <sup>1</sup> There were 532 interval deaths for the diagnosed hypertension outcome and 57 interval deaths for the visit-based hypertension outcome prior to administrative censoring.

**eTable 4. Crude incidence rates and adjusted\* hazard ratios (95% confidence intervals) for incident visit-based hypertension, according to baseline categories of high sensitivity cardiac troponin T: further stratified by baseline blood pressure (N=5,479)**

|                                                                                              |       |            |                                                 | Proportional Hazards Regression† | Competing Risks Regression‡ |
|----------------------------------------------------------------------------------------------|-------|------------|-------------------------------------------------|----------------------------------|-----------------------------|
| Baseline hs-cTnT                                                                             | N     | Events (n) | Incidence rate, per 1,000 person years (95% CI) | HR (95% CI)                      | HR (95% CI)                 |
| <b>NORMOTENSIVE SUBGROUP</b><br>(BP ≤120 mmHg systolic and ≤80 mmHg diastolic)               |       |            |                                                 |                                  |                             |
| <b>Categorical</b>                                                                           |       |            |                                                 |                                  |                             |
| <5 ng/L                                                                                      | 3,088 | 515        | 29.8 (27.4-32.5)                                | 1 (reference)                    | 1 (reference)               |
| 5-8 ng/L                                                                                     | 753   | 156        | 37.5 (32.0-43.8)                                | 1.17<br>(0.97-1.41)              | 1.16<br>(0.96-1.41)         |
| 9-13 ng/L                                                                                    | 200   | 57         | 52.4 (40.4-68.0)                                | 1.45<br>(1.09-1.93)              | 1.56<br>(1.17-2.09)         |
| ≥14 ng/L                                                                                     | 62    | 20         | 57.6 (37.1-89.2)                                | 1.86<br>(1.18-2.94)              | 1.72<br>(1.11-2.69)         |
| <i>p-value for linear trend</i>                                                              |       |            |                                                 | <0.001                           | <0.001                      |
| <b>Continuous</b>                                                                            |       |            |                                                 |                                  |                             |
| Log hs-cTnT                                                                                  | 4,103 | 748        | 32.7 (30.5-35.2)                                | 1.20<br>(1.08-1.33)              | 1.22<br>(1.09-1.35)         |
| <b>PREHYPERTENSION SUBGROUP</b><br>(BP >120 <140 mmHg systolic and/or >80<90 mmHg diastolic) |       |            |                                                 |                                  |                             |
| <b>Categorical</b>                                                                           |       |            |                                                 |                                  |                             |
| <5 ng/L                                                                                      | 1,051 | 544        | 104.2 (95.8-113.3)                              | 1 (reference)                    | 1 (reference)               |
| 5-8 ng/L                                                                                     | 377   | 195        | 107.0 (93.0-123.2)                              | 1.03<br>(0.87-1.22)              | 1.05<br>(0.88-1.25)         |
| 9-13 ng/L                                                                                    | 106   | 63         | 122.2 (95.5-156.5)                              | 1.18<br>(0.90-1.56)              | 1.18<br>(0.91-1.54)         |
| ≥14 ng/L                                                                                     | 38    | 21         | 116.9 (76.2-179.3)                              | 1.19<br>(0.76-1.87)              | 1.29<br>(0.83-2.02)         |
| <i>p-value for linear trend</i>                                                              |       |            |                                                 | 0.226                            | 0.133                       |
| <b>Continuous</b>                                                                            |       |            |                                                 |                                  |                             |
| Log hs-cTnT                                                                                  | 1,572 | 823        | 106.4 (99.3-113.9)                              | 1.03<br>(0.93-1.14)              | 1.05<br>(0.95-1.15)         |

\* Adjusted for age (years), race-center (whites-Washington County; whites-Minneapolis; blacks-Jackson; blacks-Forsyth County, whites-Forsyth County), sex (male or female), body mass index (kg/m<sup>2</sup>), smoking (current; former; never), LDL-cholesterol (mg/dL), HDL-cholesterol (mg/dL), triglycerides (mg/dL), estimated glomerular filtration rate (mL/min/1.73m<sup>2</sup>), current lipid-lowering medication use (yes or no), left ventricular hypertrophy (yes or no), diagnosed diabetes (yes or no). Abbreviations as per Table 1.

†Cox regression for diagnosed hypertension outcome, cloglog regression for visit-based hypertension  
‡Fine-Gray regression model. <sup>1</sup> There were 532 interval deaths for the diagnosed hypertension outcome and 57 interval deaths for the visit-based hypertension outcome prior to administrative censoring.

**eTable 5. Adjusted\* Cox Hazard Ratios (HRs) for incident diagnosed hypertension (N=6,516) and for visit-based incident hypertension (N=5675) by baseline hs-cTnT status, with additional adjustment for either baseline mean BP or NT-proBNP**

| <b>Additional Correction for Baseline (Visit 2) Mean BP</b>   |          |                   |                     |                |                                 |          |                   |                     |                |
|---------------------------------------------------------------|----------|-------------------|---------------------|----------------|---------------------------------|----------|-------------------|---------------------|----------------|
| <b>Diagnosed hypertension</b>                                 |          |                   |                     |                | <b>Visit Based hypertension</b> |          |                   |                     |                |
| <b>Visit 2 hs-cTnT</b>                                        | <b>N</b> | <b>Events (n)</b> | <b>HR (95% CI)</b>  | <b>p-value</b> | <b>Visit 2 hs-cTnT</b>          | <b>N</b> | <b>Events (n)</b> | <b>HR (95% CI)</b>  | <b>p-value</b> |
| <5 ng/L                                                       | 4,681    | 3,108             | 1 (ref.)            |                | <5 ng/L                         | 4,139    | 1,059             | 1 (ref.)            |                |
| 5-8 ng/L                                                      | 1,317    | 936               | 1.12<br>(1.04-1.21) | 0.004          | 5-8 ng/L                        | 1,130    | 351               | 1.16<br>(1.07-1.25) | <0.001         |
| 9-13 ng/L                                                     | 384      | 281               | 1.27<br>(1.12-1.45) | <0.001         | 9-13 ng/L                       | 306      | 120               | 1.29<br>(1.13-1.46) | <0.001         |
| ≥14 ng/L                                                      | 134      | 96                | 1.20<br>(0.98-1.48) | 0.083          | ≥14 ng/L                        | 100      | 41                | 1.26<br>(1.02-1.55) | 0.032          |
| <i>p-value for trend</i>                                      |          |                   | <0.001              |                | <i>p-value for trend</i>        |          |                   | <0.001              |                |
| Log(hs-cTnT)                                                  | 6,516    | 4,421             | 1.11<br>(1.07-1.16) | <0.001         | Log (hs-cTnT)                   | 5,675    | 1,571             | 1.13<br>(1.08-1.18) | <0.001         |
| <b>Additional Correction for Baseline (Visit 2) NT-proBNP</b> |          |                   |                     |                |                                 |          |                   |                     |                |
| <b>Diagnosed hypertension</b>                                 |          |                   |                     |                | <b>Visit Based hypertension</b> |          |                   |                     |                |
| <b>Visit 2 hs-cTnT</b>                                        | <b>N</b> | <b>Events (n)</b> | <b>HR (95% CI)</b>  | <b>p-value</b> | <b>Visit 2 hs-cTnT</b>          | <b>N</b> | <b>Events (n)</b> | <b>HR (95% CI)</b>  | <b>p-value</b> |
| <5 ng/L                                                       | 4,678    | 3,107             | 1 (ref.)            |                | <5 ng/L                         | 4,138    | 1,058             | 1 (ref.)            |                |
| 5-8 ng/L                                                      | 1,316    | 936               | 1.09<br>(0.96-1.24) | 0.187          | 5-8 ng/L                        | 1,129    | 351               | 1.11<br>(0.98-1.26) | 0.099          |
| 9-13 ng/L                                                     | 383      | 280               | 1.34<br>(1.10-1.64) | 0.003          | 9-13 ng/L                       | 305      | 119               | 1.33<br>(1.09-1.62) | 0.006          |
| ≥14 ng/L                                                      | 134      | 96                | 1.41<br>(1.02-1.93) | 0.036          | ≥14 ng/L                        | 100      | 41                | 1.34<br>(0.97-1.84) | 0.075          |
| <i>p-value for trend</i>                                      |          |                   | <0.001              |                | <i>p-value for trend</i>        |          |                   | 0.002               |                |
| Log(hs-cTnT)                                                  | 6,511    | 4,419             | 1.12<br>(1.04-1.20) | 0.002          | Log (hs-cTnT)                   | 5,672    | 1,569             | 1.13<br>(1.05-1.21) | <0.001         |

\*Adjusted for age (years), race-center (whites-Washington County; whites-Minneapolis; blacks-Jackson; blacks-Forsyth County, whites-Forsyth County), sex (male or female), body mass index (kg/m<sup>2</sup>), smoking (current; former; never), LDL-cholesterol (mg/dL), HDL-cholesterol (mg/dL), triglycerides (mg/dL), estimated glomerular filtration rate (mL/min/1.73m<sup>2</sup>), current lipid-lowering medication use (yes or no), diagnosed diabetes (yes or no). Abbreviations as per Table 1.

## References

1. Fine JP, Gray RJ. A proportional hazards model for the subdistribution of a competing risk. *Journal of the American Statistical Association* 1999;94:496-509
